# Supplementary material for: Measurement Invariance in the Center for Epidemiologic Studies-Depression (CES-D) Scale among English-Speaking Whites and Asians
Source: MDPI journal article supplement (doi:10.3390/ijerph18105298), 2021-05-16
Supplement: s1 [file s1]

## Supplementary materials

**Table S1.** Mean and covariance structure analysis for other models excluding four-factor model of the CES-D.

| Model                 | $\chi^2$ | $df$ | CFI   | SRMR  | RMSEA | $\Delta\chi^2$ | $\Delta df$ | $\Delta\chi^2/\Delta df$ | $\Delta CFI$ | $\Delta SRMR$ | $\Delta RMSEA$ |
|-----------------------|----------|------|-------|-------|-------|----------------|-------------|--------------------------|--------------|---------------|----------------|
| One-factor model      |          |      |       |       |       |                |             |                          |              |               |                |
| Configural invariance | 4031.92  | 850  | 0.807 | 0.079 | 0.048 |                |             |                          |              |               |                |
| Metric invariance     | 4479.59  | 926  | 0.785 | 0.108 | 0.049 | 447.67         | 76          | 5.89                     | 0.022        | 0.002         | 0.001          |
| Scalar invariance     | 5035.86  | 1006 | 0.756 | 0.109 | 0.050 | 1003.94        | 156         | 6.44                     | 0.051        | 0.003         | 0.002          |
| Two-factor model      |          |      |       |       |       |                |             |                          |              |               |                |
| Configural invariance | 2382.03  | 845  | 0.907 | 0.051 | 0.034 |                |             |                          |              |               |                |
| Metric invariance     | 2630.53  | 917  | 0.896 | 0.057 | 0.034 | 248.50         | 72          | 3.45                     | 0.011        | 0.006         | 0.001          |
| Scalar invariance     | 3131.50  | 997  | 0.871 | 0.057 | 0.037 | 749.47         | 152         | 4.93                     | 0.036        | 0.006         | 0.003          |
| Three-factor model    |          |      |       |       |       |                |             |                          |              |               |                |
| Configural invariance | 2297.43  | 835  | 0.911 | 0.049 | 0.033 |                |             |                          |              |               |                |

---

|            |         |     |       |       |       |        |     |      |       |       |       |
|------------|---------|-----|-------|-------|-------|--------|-----|------|-------|-------|-------|
| Metric     |         |     |       |       |       |        |     |      |       |       |       |
| invariance | 2519.95 | 903 | 0.902 | 0.055 | 0.033 | 212.52 | 68  | 3.13 | 0.009 | 0.006 | 0.001 |
| Scalar     |         |     |       |       |       |        |     |      |       |       |       |
| invariance | 3026.11 | 983 | 0.876 | 0.055 | 0.036 | 728.68 | 148 | 4.92 | 0.035 | 0.006 | 0.003 |

---

Note.  $N = 1,606$ . CFI, SRMR, and RMSEA are comparative fit index, standardized root-mean-square residual, and root-mean-square error of approximation, respectively. CES-D is the Center for Epidemiologic Studies-Depression.

**Table S2.** Differences in factor means between samples for the four-factor model.

| CES-D subscale         | Main finding                                                  |
|------------------------|---------------------------------------------------------------|
| Somatic complaints     | Australian, Americans, Filipinos, and Singaporeans < Indians  |
| Depressed affect       | Australian < Americans, Singaporeans, and Filipinos < Indians |
| (low) Positive affect  | Australian, Americans, Filipinos, and Indians < Singaporeans  |
| Interpersonal problems | Australian < Americans, Singaporeans and Filipinos < Indians  |

*Note.* CES-D is the Center for Epidemiologic Studies-Depression.
